# Supplementary material
Source: Springer Nature journal article supplement (https://www.springermedizin.de/resource/supplementary/13058_2010_2627_MOESM7_ESM.pdf/9702184)

**A.**

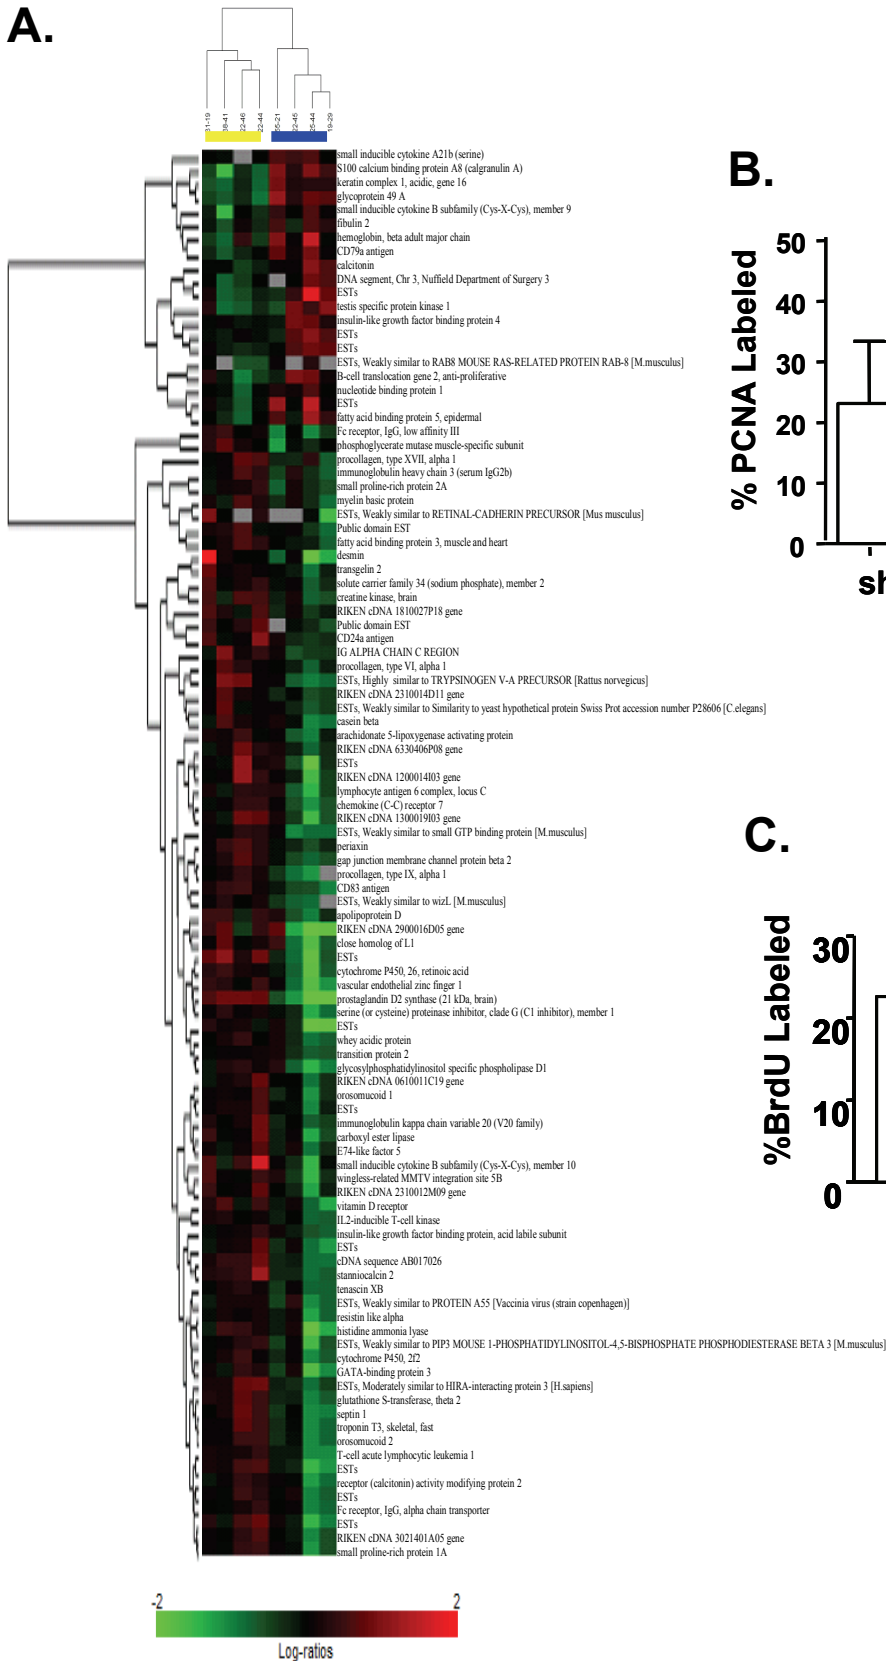

**B.**

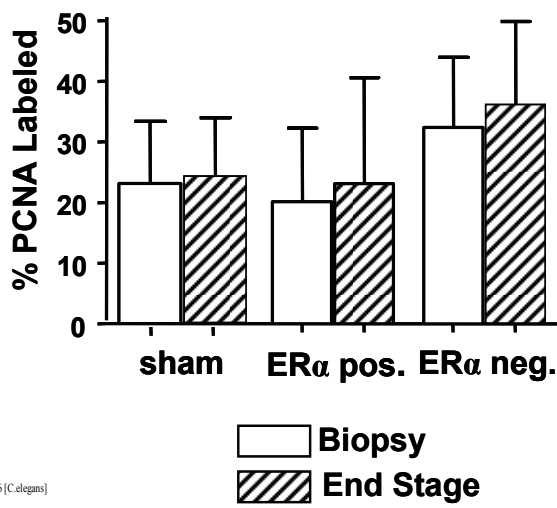

**C.**

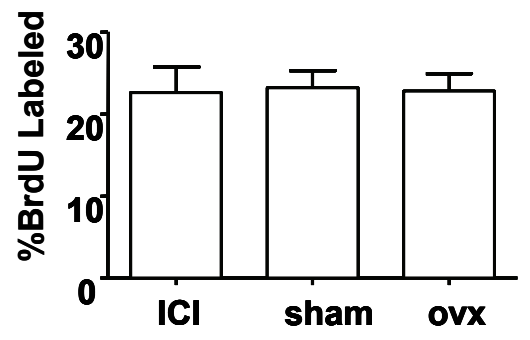

Supplement: MOESM7 [file 9702184]
